# Supplementary material for: A Biallelic Mutation in CCDC103 Impairs Sperm Motility due to the Absence of Dynein Arms
Source: Hindawi journal article supplement (doi:10.1155/2024/6673310), 2024-01-01
Supplement: f1 [file 6673310.f1.pdf]

| Primary antibody                 | Product ID & Company   |
|----------------------------------|------------------------|
| Mouse anti-AC- $\alpha$ -Tubulin | Sigma                  |
| Rabbit anti-DNAI2                | 17533-1-AP Proteintech |
| Rabbit anti-DNAH1                | HPA036806 Sigma        |
| Secondary antibody               | Product ID & Company   |
| Goat anti rabbit IgG H&L         | Abcam                  |
| Goat anti mouse IgG H&L          | Abcam                  |
| Primer name                      | Base sequence          |
| chr17-42979917-Reverse           | GTAGCTTGCCGCATCAGTCA   |
| chr17-42979917-Forward           | GTTGCAGAACAGCTGGAAGA   |
| chr17-42978905-Reverse           | CAGAGAATCCTGCTGGACTA   |
| chr17-42978905-Forward           | CAGTCAGCTATCGCTGTTGT   |

**Table S1. Antibody & Primer List**

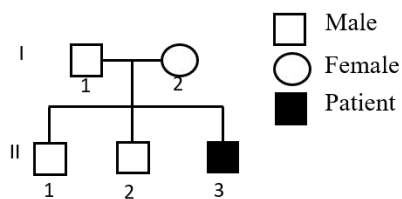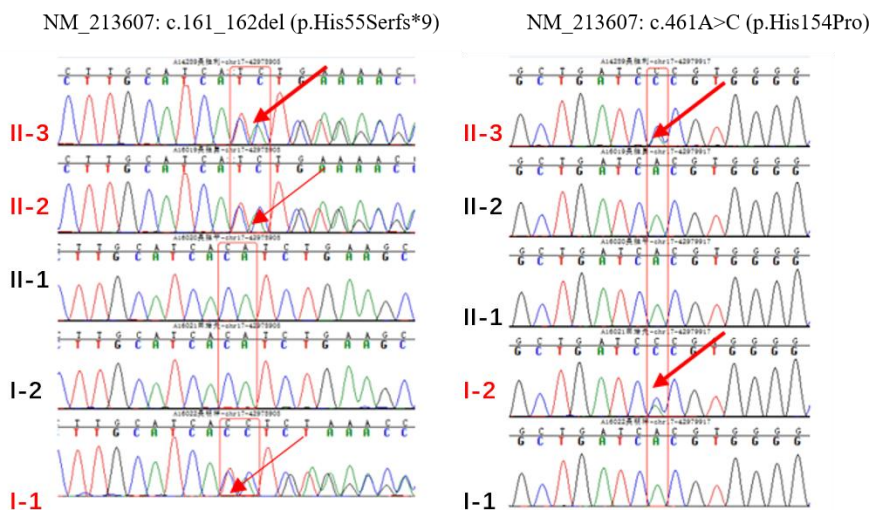

**Figure S1. Sanger sequencing validation of the *CCDC103* mutation.**

Note: Red arrows indicate the mutation.

| cDNA mutation                                 | Protein alteration | Mutation type                  | Allele frequency in ExAC Browser | Function prediction                           |          |
|-----------------------------------------------|--------------------|--------------------------------|----------------------------------|-----------------------------------------------|----------|
| CCDC103:<br>NM_213607: Exon<br>3:c.161_162del | p.His55Serfs*9     | Exonic deletion,<br>frameshift | 0                                | SIFT<br>PolyPhen-2<br>Mutation-Assessor<br>NA | NA<br>NA |
| CCDC103:<br>NM_213607: Exon<br>4:c.461A>C     | p.His154Pro        | Missence mutation              | 0.0013                           | SIFT<br>PolyPhen-2<br>Mutation-Assessor<br>M  | T<br>P   |

NA, not available. T: tolerant. P: possibly damaging. M: medium.

**Table S2.** Biallelic *CCDC103* Mutations Identified in the patient with PCD.

| Gene  | Chromosome location GRCh37/hg19 | Nucleic acid changes | Amino acid changes | Transcripts | Exons Introns | Heterozygosity | Allele frequency in ExAC Browser | Pathogenicity |
|-------|---------------------------------|----------------------|--------------------|-------------|---------------|----------------|----------------------------------|---------------|
| DNAH9 | chr17:160319-5                  | c.5020G>A            | p.G1674R           | NM_001372   | Exon 23       | Het            | 0                                | NA            |
| DNAH9 | chr17:175737-2                  | c.9560A>G            | p.N3187S           | NM_001372   | Exon 50       | Het            | 0.000058                         | NA            |

**Table S3.** Potentially deleterious variants found in affected individual.

Het, Heterozygous; NA, not available.

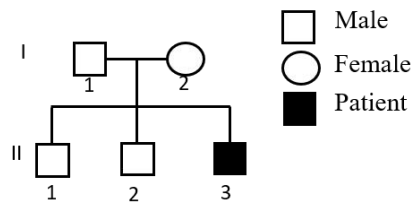

NM\_001372: c.5020G>A, p.G1674R

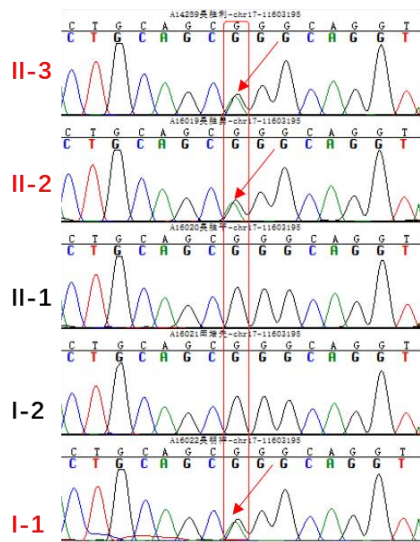

NM\_001372: c.9560A>G, p.N3187S

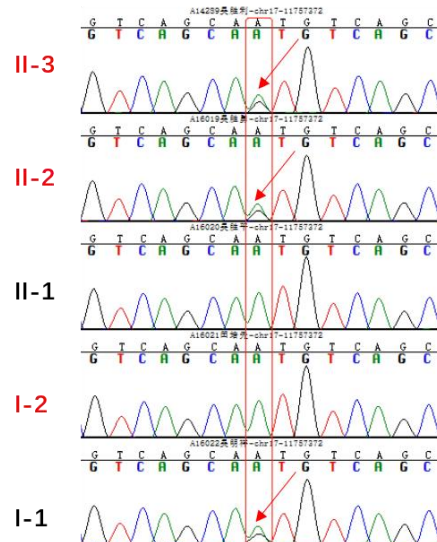

**Figure S2. Sanger sequencing validation of the *DNAH5* mutation.**

Note: Red arrows indicate the mutation.
